# Supplementary material
Source: Springer Nature journal article supplement (https://www.springermedizin.de/resource/supplementary/12936_2011_1993_MOESM2_ESM.pdf/9542662)

Rainfall (mm)

Malaria cases

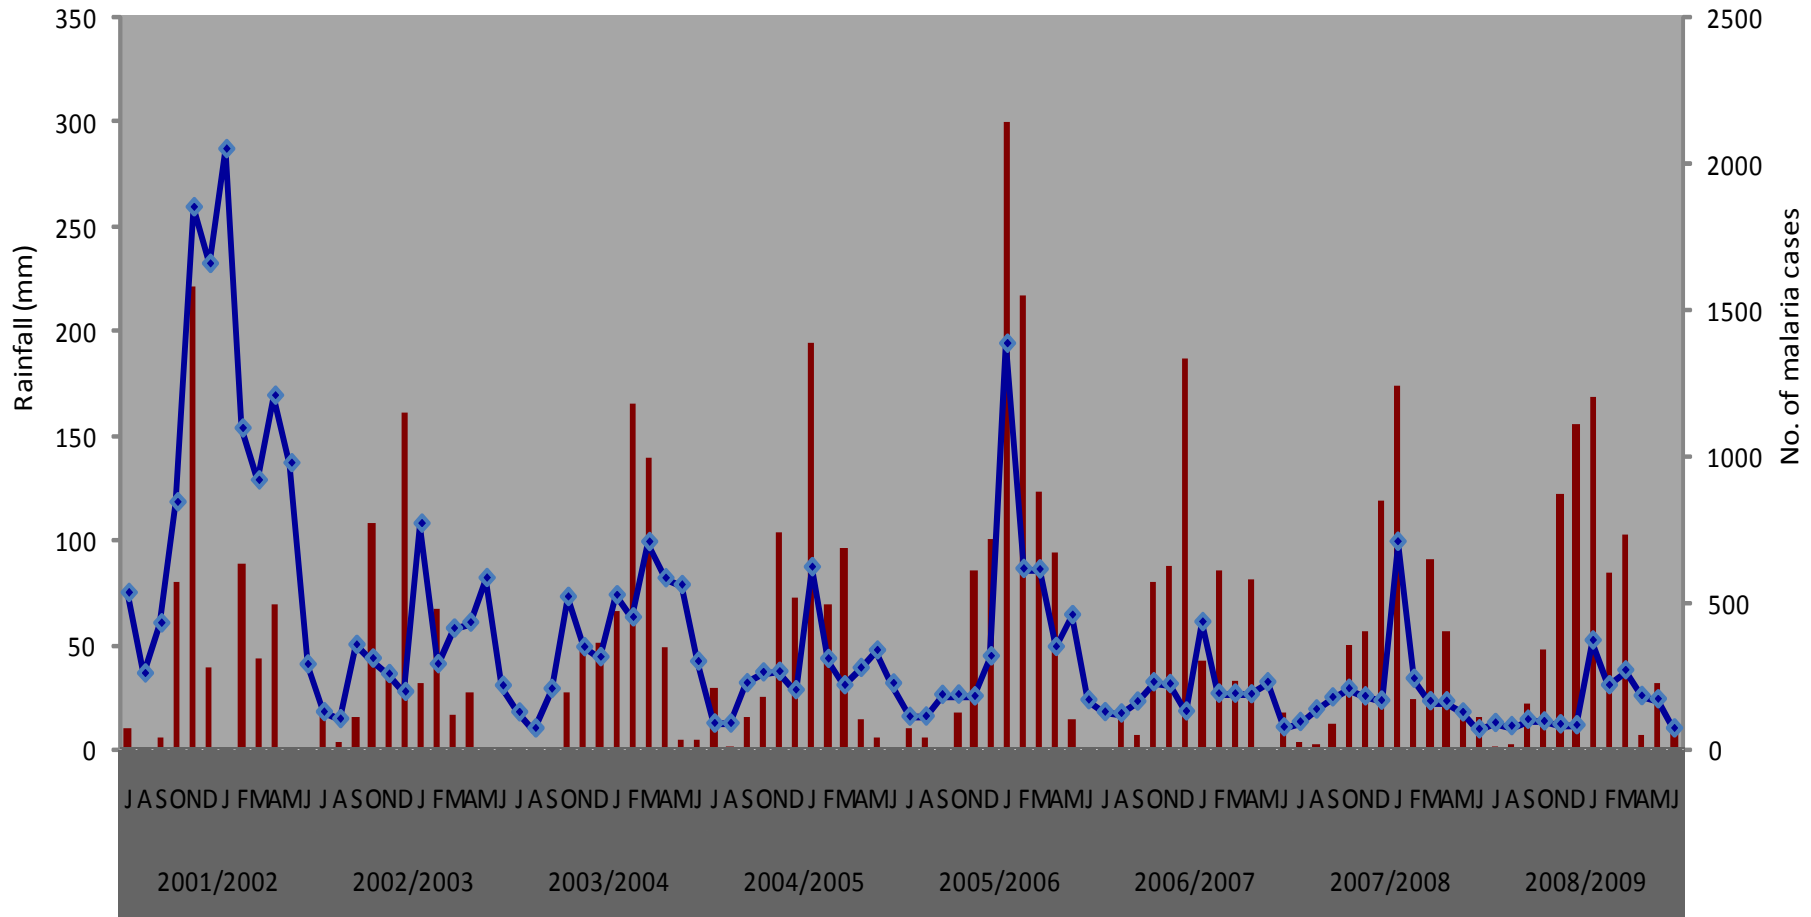

Malariaseason

Supplement: MOESM2 [file 9542662]
